# Supplementary material for: Biodegradation Potential and Putative Catabolic Genes of Culturable Bacteria from an Alpine Deciduous Forest Site
Source: MDPI journal article supplement (doi:10.3390/microorganisms9091920), 2021-09-10
Supplement: s1 [file s1]

## Supplementary Materials

### Biodegradation potential and putative catabolic genes of culturable bacteria from an Alpine deciduous forest site

Caroline Poyntner<sup>1</sup>, Andrea Kutzner<sup>1</sup> and Rosa Margesin<sup>1</sup>

<sup>1</sup>Department of Microbiology, University of Innsbruck, Technikerstrasse 25, 6020 Innsbruck, Austria

**Table S1.** Primers and PCR conditions for partial 16S rRNA gene amplification and the detection of putative catabolic genes: catechol-1,2-dioxygenase (C1,2D); multicomponent phenol hydroxylase (MPH); protocatechuate-3,4-dioxygenase (P3,4D).

| Gene     | Forward Primer 5'-3'            | Reverse Primer 5'-3'          | PCR conditons                                                                                                                                                                                                                                     | Ref. |
|----------|---------------------------------|-------------------------------|---------------------------------------------------------------------------------------------------------------------------------------------------------------------------------------------------------------------------------------------------|------|
| 16S rRNA | AGAGTTTGATCCTGGCTC              | AAGGAGGTGATCCAGCCGCA          | i) 5 min at 95 °C;<br>ii) 35 cycles of 30 s at 95 °C, 30 s at 52 °C, 1 min at 72 °C;<br>iii) 10 min at 72 °C                                                                                                                                      | [1]  |
| C1,2D    | CGCGGATTGTNGAYSTNTGGCANGCNAAYAC | GACTCAGGTNGCRWANGCRAARTCRTC   | i) 3 min at 94 °C;<br>ii) 30 cycles 30 s at 94 °C, 40 s at 60 °C, 60 s at 72 °C;<br>iii) 10 min at 72 °C                                                                                                                                          | [2]  |
| MPH      | GCGCGGAATTCGARTAYGTGYTGACCAA    | GATCTCGAGCCGCGCCAGAACCAYTTRTC | i) 3 min at 94 °C;<br>ii) 30 cycles 30 s at 94 °C, 40 s at 60 °C, 60 s at 72 °C;<br>iii) 10 min at 72 °C                                                                                                                                          | [2]  |
| P3,4D    | TGCCCNTACCACGGCTG               | GCDCCGAKCTTCCAGTT             | i) 5 min at 94 °C;<br>ii) 10 cycles 1 min at 94 °C, 1 min at 60 °C, 1 min at 72 °C;<br>iii) 15 cycles of 1 min at 94 °C, 1 min at 55 °C, 1 min at 72 °C;<br>iv) 15 cycles of 1 min at 94 °C, 1 min at 50 °C, 1 min at 72 °C;<br>v) 5 min at 72 °C | [3]  |

#### References

- [1] Lane, D. 16S/23S rRNA sequencing. In *Nucleic acid techniques in bacterial systematics*, Stackebrandt, E., Goodfellow, M., Eds.; John Wiley & Sons: Chichester, 1991, pp. 115-175.
- [2] Tuan, N.N.; Hsieh, H.-C.; Lin, Y.-W.; Huang, S.-L. Analysis of bacterial degradation pathways for long-chain alkylphenols involving phenol hydroxylase, alkylphenol monooxygenase and catechol dioxygenase genes. *Biores. Technol.* **2011**, *102*, 4232–4240.
- [3] Li, C.; Zhang, C.; Song, G.; Liu, H.; Sheng, G.; Ding, Z.; Wang, Z.; Sun, Y.; Xu, Y.; Chen, J. Characterization of a protocatechuate catabolic gene cluster in *Rhodococcus ruber* OA1 Involved in naphthalene degradation. *Ann Microbiol* **2016**, *66*, 469–478.

**Table S2.** Identification of the 55 strains investigated, growth temperature range on R2A agar, effect of temperature (5°C and 20°C) on the utilization of organic compounds as sole carbon source, and presence of catabolic genes.

OD600:    < 0.100    0.1 - <0.25    0.25 - <0.5    0.5 - < 0.75    0.75 - >1    >=1

LSS, lignosulfonic acid; BPA, bisphenol A; C1,2D, catechol-1,2-dioxygenase; MPH, multicomponent phenol hydroxylase; P3,4D, protocatechuate-3,4-dioxygenase

| Strain | Accession number | OTU   | Phylum         | Species                               | Growth temp. range (°C) | LSS       |            |           |            | Catechol    |              |             |              | Phenol      |              |             |              | BPA         |              |             |              | BPA + YE    |              |             |              | C1,2D | MPH  | P3,4D |   |  |
|--------|------------------|-------|----------------|---------------------------------------|-------------------------|-----------|------------|-----------|------------|-------------|--------------|-------------|--------------|-------------|--------------|-------------|--------------|-------------|--------------|-------------|--------------|-------------|--------------|-------------|--------------|-------|------|-------|---|--|
|        |                  |       |                |                                       |                         | 2 g/L 5°C | 2 g/L 20°C | 5 g/L 5°C | 5 g/L 20°C | 0.2 g/L 5°C | 0.2 g/L 20°C | 0.5 g/L 5°C | 0.5 g/L 20°C | 0.2 g/L 5°C | 0.2 g/L 20°C | 0.5 g/L 5°C | 0.5 g/L 20°C | 0.2 g/L 5°C | 0.2 g/L 20°C | 0.5 g/L 5°C | 0.5 g/L 20°C | 0.2 g/L 5°C | 0.2 g/L 20°C | 0.5 g/L 5°C | 0.5 g/L 20°C |       |      |       |   |  |
| AM0-02 | MW969693         | OTU17 | Actinobacteria | <i>Rhodococcus sp.</i>                | 0-30                    | <0.1      | 0.250      | 0.221     | 0.286      | 0.275       | 0.270        | 0.112       | <0.1         | 0.104       | 0.104        | <0.1        | <0.1         | <0.1        | <0.1         | <0.1        | <0.1         | <0.1        | <0.1         | <0.1        | <0.1         |       |      | 1     |   |  |
| AM0-03 | MW969733         | OTU21 | Bacteroidetes  | <i>Pedobacter ginsenosidimutans</i>   | 0-30                    | <0.1      | <0.1       | <0.1      | <0.1       | <0.1        | 0.120        | 0.133       | 0.322        | <0.1        | <0.1         | <0.1        | <0.1         | <0.1        | <0.1         | <0.1        | <0.1         | <0.1        | <0.1         | <0.1        | <0.1         | <0.1  |      |       |   |  |
| AM0-04 | MW980058         | OTU20 | Bacteroidetes  | <i>Duganella levis</i>                | 0-30                    | <0.1      | <0.1       | 0.130     | <0.1       | <0.1        | <0.1         | <0.1        | <0.1         | <0.1        | <0.1         | <0.1        | <0.1         | <0.1        | <0.1         | <0.1        | <0.1         | <0.1        | <0.1         | <0.1        | <0.1         | <0.1  |      |       | 1 |  |
| AM0-06 | MW969759         | OTU09 | Proteobacteria | <i>Pseudomonas sp.</i>                | 0-30                    | 0.136     | <0.1       | 0.299     | 0.141      | 0.231       | 0.112        | <0.1        | 0.105        | 0.241       | 0.220        | 0.105       | 0.270        | <0.1        | <0.1         | <0.1        | <0.1         | <0.1        | <0.1         | 0.152       | <0.1         | 0.237 | 1    | 1     | 1 |  |
| AM0-07 | MW969809         | OTU04 | Proteobacteria | <i>Collimonas sp.</i>                 | 0-30                    | <0.1      | <0.1       | 0.137     | 0.152      | <0.1        | 0.106        | <0.1        | 0.246        | <0.1        | <0.1         | <0.1        | <0.1         | <0.1        | <0.1         | <0.1        | <0.1         | <0.1        | <0.1         | 0.121       | <0.1         | <0.1  |      |       |   |  |
| AM0-10 | MW969906         | OTU19 | Proteobacteria | <i>Pseudomonas jessenii</i>           | 0-30                    | <0.1      | <0.1       | 0.104     | 0.111      | <0.1        | 0.135        | <0.1        | 0.201        | <0.1        | <0.1         | <0.1        | <0.1         | <0.1        | <0.1         | <0.1        | <0.1         | <0.1        | <0.1         | <0.1        | <0.1         | 0.109 | 1    |       | 1 |  |
| AM0-14 | MW971569         | OTU18 | Proteobacteria | <i>Serratia myotis</i>                | 0-35                    | <0.1      | 0.735      | 0.118     | 0.475      | <0.1        | <0.1         | <0.1        | 0.104        | <0.1        | 0.483        | <0.1        | 0.108        | <0.1        | 0.259        | <0.1        | <0.1         | <0.1        | <0.1         | <0.1        | <0.1         | <0.1  |      |       |   |  |
| AM0-15 | MW971570         | OTU06 | Bacteroidetes  | <i>Pedobacter sp.</i>                 | 0-30                    | <0.1      | <0.1       | <0.1      | <0.1       | <0.1        | <0.1         | <0.1        | 0.137        | <0.1        | <0.1         | <0.1        | <0.1         | <0.1        | <0.1         | <0.1        | <0.1         | <0.1        | <0.1         | <0.1        | <0.1         | <0.1  |      |       |   |  |
| AM0-16 | MW971571         | OTU02 | Proteobacteria | <i>Collimonas fungivorans</i>         | 0-30                    | <0.1      | <0.1       | <0.1      | <0.1       | <0.1        | <0.1         | <0.1        | 0.110        | <0.1        | <0.1         | <0.1        | <0.1         | <0.1        | <0.1         | <0.1        | <0.1         | <0.1        | <0.1         | <0.1        | <0.1         | <0.1  |      |       |   |  |
| AM0-17 | MW971573         | OTU06 | Bacteroidetes  | <i>Pedobacter sp.</i>                 | 0-30                    | <0.1      | <0.1       | <0.1      | <0.1       | <0.1        | <0.1         | <0.1        | 0.174        | <0.1        | <0.1         | <0.1        | <0.1         | <0.1        | <0.1         | <0.1        | <0.1         | <0.1        | <0.1         | <0.1        | <0.1         | <0.1  | 1    |       | 1 |  |
| AM0-18 | MW971574         | OTU02 | Proteobacteria | <i>Collimonas fungivorans</i>         | 0-30                    | <0.1      | <0.1       | <0.1      | <0.1       | <0.1        | <0.1         | <0.1        | 0.105        | <0.1        | <0.1         | <0.1        | <0.1         | <0.1        | <0.1         | <0.1        | <0.1         | <0.1        | 0.166        | 0.354       | 0.118        | <0.1  | 1    |       |   |  |
| AM0-19 | MW971686         | OTU11 | Proteobacteria | <i>Serratia quinivorans</i>           | 0-35                    | 0.220     | 0.681      | 0.302     | 0.752      | <0.1        | <0.1         | <0.1        | <0.1         | 0.145       | 0.365        | <0.1        | 0.137        | <0.1        | 0.681        | <0.1        | <0.1         | <0.1        | <0.1         | <0.1        | <0.1         | <0.1  | <0.1 |       |   |  |
| AM0-23 | MW971687         | OTU02 | Proteobacteria | <i>Collimonas fungivorans</i>         | 0-30                    | 0.138     | <0.1       | 0.163     | <0.1       | <0.1        | <0.1         | <0.1        | <0.1         | <0.1        | <0.1         | <0.1        | <0.1         | <0.1        | <0.1         | <0.1        | <0.1         | <0.1        | <0.1         | <0.1        | <0.1         | <0.1  | <0.1 |       |   |  |
| AM0-28 | MW971904         | OTU16 | Actinobacteria | <i>Rhodococcus erythropolis</i>       | 0-35                    | 0.417     | 1.107      | 0.426     | 0.945      | 0.329       | 0.592        | <0.1        | 0.255        | 0.340       | 0.842        | 0.303       | 0.947        | <0.1        | <0.1         | <0.1        | <0.1         | <0.1        | <0.1         | <0.1        | <0.1         | <0.1  | <0.1 |       |   |  |
| AM0-29 | MW971928         | OTU10 | Proteobacteria | <i>Pseudomonas fluorescens</i>        | 0-30                    | <0.1      | <0.1       | <0.1      | <0.1       | <0.1        | <0.1         | <0.1        | 0.133        | <0.1        | <0.1         | <0.1        | <0.1         | <0.1        | <0.1         | <0.1        | <0.1         | <0.1        | <0.1         | <0.1        | <0.1         | <0.1  | 1    |       | 1 |  |
| AM0-30 | MW979603         | OTU02 | Proteobacteria | <i>Collimonas fungivorans</i>         | 0-30                    | <0.1      | <0.1       | <0.1      | <0.1       | <0.1        | <0.1         | <0.1        | 0.101        | 0.139       | <0.1         | <0.1        | <0.1         | <0.1        | <0.1         | <0.1        | <0.1         | <0.1        | 0.188        | 0.131       | <0.1         | <0.1  |      |       |   |  |
| AM0-31 | MW979602         | OTU13 | Proteobacteria | <i>Glaciimonas immobilis</i>          | 0-25                    | 0.391     | 0.291      | 0.376     | 0.248      | <0.1        | <0.1         | <0.1        | <0.1         | 0.275       | 0.451        | <0.1        | 0.297        | <0.1        | <0.1         | <0.1        | <0.1         | <0.1        | <0.1         | <0.1        | <0.1         | <0.1  |      | 1     |   |  |
| AM0-33 | MW980053         | OTU12 | Proteobacteria | <i>Pseudomonas frederiksbergensis</i> | -5-30                   | <0.1      | <0.1       | 0.180     | 0.139      | <0.1        | <0.1         | 0.106       | 0.141        | <0.1        | <0.1         | <0.1        | <0.1         | <0.1        | <0.1         | <0.1        | <0.1         | <0.1        | <0.1         | <0.1        | <0.1         | <0.1  | 1    |       | 1 |  |
| AM0-34 | MW979604         | OTU08 | Firmicutes     | <i>Sporosarcina globispora</i>        | -5-25                   | <0.1      | <0.1       | <0.1      | <0.1       | <0.1        | <0.1         | <0.1        | <0.1         | <0.1        | <0.1         | <0.1        | <0.1         | <0.1        | <0.1         | <0.1        | <0.1         | <0.1        | n.b.         | n.b.        | n.b.         | n.b.  |      |       |   |  |
| AM0-35 | MW979608         | OTU01 | Proteobacteria | <i>Pseudomonas sp.</i>                | 0-30                    | <0.1      | <0.1       | <0.1      | <0.1       | <0.1        | <0.1         | <0.1        | 0.152        | <0.1        | <0.1         | <0.1        | <0.1         | <0.1        | <0.1         | <0.1        | <0.1         | <0.1        | <0.1         | <0.1        | <0.1         | <0.1  | 1    |       | 1 |  |
| AM0-36 | MW979609         | OTU01 | Proteobacteria | <i>Pseudomonas sp.</i>                | 0-30                    | <0.1      | <0.1       | <0.1      | 0.158      | <0.1        | <0.1         | <0.1        | 0.108        | <0.1        | <0.1         | <0.1        | <0.1         | <0.1        | <0.1         | <0.1        | <0.1         | <0.1        | <0.1         | <0.1        | <0.1         | <0.1  | <0.1 |       |   |  |
| AM0-39 | MW979611         | OTU03 | Proteobacteria | <i>Pseudomonas sp.</i>                | -5-30                   | 0.140     | <0.1       | 0.180     | 0.141      | 0.267       | 0.147        | 0.157       | 0.203        | <0.1        | <0.1         | <0.1        | <0.1         | <0.1        | <0.1         | <0.1        | <0.1         | <0.1        | <0.1         | <0.1        | <0.1         | <0.1  | 1    |       |   |  |
| AM0-44 | MW979612         | OTU03 | Proteobacteria | <i>Pseudomonas sp.</i>                | -5-30                   | <0.1      | <0.1       | <0.1      | 0.135      | <0.1        | 0.130        | <0.1        | 0.137        | <0.1        | <0.1         | <0.1        | <0.1         | <0.1        | <0.1         | <0.1        | <0.1         | <0.1        | <0.1         | <0.1        | <0.1         | <0.1  | 1    |       | 1 |  |
| AM0-51 | MW979617         | OTU01 | Proteobacteria | <i>Pseudomonas sp.</i>                | 0-30                    | <0.1      | <0.1       | <0.1      | <0.1       | 0.119       | <0.1         | 0.159       | 0.220        | <0.1        | <0.1         | <0.1        | <0.1         | <0.1        | <0.1         | <0.1        | <0.1         | <0.1        | <0.1         | <0.1        | <0.1         | <0.1  | 1    |       | 1 |  |
| AM0-55 | MW979619         | OTU02 | Proteobacteria | <i>Collimonas fungivorans</i>         | 0-30                    | <0.1      | <0.1       | 0.105     | 0.138      | <0.1        | 0.101        | <0.1        | 0.130        | <0.1        | <0.1         | <0.1        | <0.1         | <0.1        | <0.1         | <0.1        | <0.1         | <0.1        | n.b.         | n.b.        | n.b.         | n.b.  | 1    |       |   |  |
| AM0-58 | MW979618         | OTU05 | Proteobacteria | <i>Pseudomonas fluorescens</i>        | 0-30                    | <0.1      | 0.115      | 0.117     | 0.184      | 0.274       | 0.168        | <0.1        | 0.221        | <0.1        | <0.1         | <0.1        | <0.1         | <0.1        | <0.1         | <0.1        | <0.1         | <0.1        | <0.1         | <0.1        | <0.1         | <0.1  |      |       |   |  |
| AM0-61 | MW979620         | OTU02 | Proteobacteria | <i>Collimonas fungivorans</i>         | 0-30                    | <0.1      | <0.1       | 0.140     | 0.128      | <0.1        | 0.108        | <0.1        | 0.201        | <0.1        | <0.1         | <0.1        | <0.1         | <0.1        | <0.1         | <0.1        | <0.1         | <0.1        | n.b.         | n.b.        | n.b.         | n.b.  |      |       |   |  |
| AM0-62 | MW979691         | OTU02 | Proteobacteria | <i>Collimonas fungivorans</i>         | 0-30                    | <0.1      | <0.1       | 0.119     | 0.129      | <0.1        | 0.117        | <0.1        | 0.203        | <0.1        | <0.1         | <0.1        | <0.1         | <0.1        | <0.1         | <0.1        | <0.1         | <0.1        | 0.162        | <0.1        | 0.111        | <0.1  |      |       |   |  |
| AM0-63 | MW979751         | OTU14 | Proteobacteria | <i>Pseudomonas fluorescens</i>        | 0-30                    | <0.1      | <0.1       | <0.1      | 0.226      | 0.356       | 0.269        | 0.115       | 0.100        | <0.1        | <0.1         | <0.1        | <0.1         | <0.1        | <0.1         | <0.1        | <0.1         | <0.1        | <0.1         | <0.1        | 0.112        | <0.1  | 1    |       |   |  |
| AM0-64 | MW979752         | OTU02 | Proteobacteria | <i>Collimonas fungivorans</i>         | 0-30                    | <0.1      | <0.1       | 0.133     | 0.130      | <0.1        | 0.113        | <0.1        | 0.218        | <0.1        | <0.1         | <0.1        | <0.1         | <0.1        | <0.1         | <0.1        | <0.1         | <0.1        | <0.1         | <0.1        | 0.307        | <0.1  |      |       |   |  |
| AM0-65 | MW979753         | OTU04 | Proteobacteria | <i>Collimonas sp.</i>                 | 0-30                    | <0.1      | <0.1       | 0.109     | 0.117      | <0.1        | 0.118        | 0.103       | 0.251        | <0.1        | <0.1         | <0.1        | <0.1         | <0.1        | <0.1         | <0.1        | <0.1         | <0.1        | <0.1         | <0.1        | <0.1         | <0.1  |      |       |   |  |
| AM0-66 | MW979755         | OTU15 | Proteobacteria | <i>Pseudomonas fluorescens</i>        | -5-30                   | <0.1      | <0.1       | <0.1      | 0.148      | 0.257       | 0.118        | <0.1        | 0.105        | <0.1        | <0.1         | <0.1        | <0.1         | <0.1        | <0.1         | <0.1        | <0.1         | <0.1        | <0.1         | <0.1        | <0.1         | <0.1  | 1    |       |   |  |
| AM0-68 | MW979754         | OTU23 | Firmicutes     | <i>Paenibacillus sinopodophylli</i>   | 0-30                    | <0.1      | <0.1       | <0.1      | 0.134      | <0.1        | 0.112        | <0.1        | 0.215        | <0.1        | <0.1         | <0.1        | <0.1         | <0.1        | <0.1         | <0.1        | <0.1         | <0.1        | <0.1         | <0.1        | <0.1         | <0.1  | <0.1 |       |   |  |
| AM0-69 | MW979756         | OTU02 | Proteobacteria | <i>Collimonas fungivorans</i>         | 0-30                    | <0.1      | <0.1       | <0.1      | 0.129      | &           |              |             |              |             |              |             |              |             |              |             |              |             |              |             |              |       |      |       |   |  |

**Table S3.** Accession numbers of sequenced genes Catechol-1,2-dioxygenase (C1,2D), multicomponent phenol hydroxylase (MPH) and protocatechuate-3,4-dioxygenase (P3,4D) deposited at Genbank NCBI (<https://www.ncbi.nlm.nih.gov/genbank/>).

| Strain | C1,2D    | MPH      | P3,4D    |
|--------|----------|----------|----------|
| AM0-02 |          |          | MZ603722 |
| AM0-06 | MZ574941 | MZ617330 | MZ603721 |
| AM0-14 |          |          |          |
| AM0-19 |          |          |          |
| AM0-31 |          | MZ617333 |          |
| AM0-39 | MZ617341 |          |          |
| AM0-58 |          |          |          |
| AM0-63 | MZ617335 |          |          |
| AM0-64 |          |          |          |
| AM0-66 | MZ617336 |          |          |
| AM0-71 | MZ617338 | MZ617331 | MZ603720 |
| AM0-75 |          |          | MZ617344 |
| AM0-77 |          | MZ617332 | MZ617345 |
| AM0-81 |          |          |          |
| AM0-85 |          |          |          |
| AM0-90 | MZ617339 |          | MZ617347 |
| AM0-92 | MZ617340 |          | MZ617348 |
| AM0-97 |          |          | MZ617346 |
| AM0-98 | MZ617342 |          |          |
